# Supplementary material for: Dielectric response and anhydrous proton conductivity in a chiral framework containing a non-polar molecular rotor
Source: Royal Society of Chemistry journal article supplement (doi:10.1039/c5dt03878b), 2015-01-01
Supplement: c5dt03878b1.pdf [file c5dt03878b1.pdf]

## **Dielectric response and anhydrous proton conductivity in a chiral framework containing a non-polar molecular rotor**

Shan-Shan Yu,<sup>a</sup> Shao-Xian Liu,<sup>a</sup> Hai-Bao Duan,<sup>\*a,b</sup>

<sup>a</sup>School of Environmental Science, Nanjing Xiaozhuang University, Nanjing 211171,,  
P.R.China

<sup>b</sup>Department of Chemistry and Biochemistry, University of California, Los Angeles,  
California 90095-1569, United States

E-mail:

[duanhaibao4660@163.com](mailto:duanhaibao4660@163.com)

## 1. Experimental

### 1.1. Chemicals and reagents

The reagents and solvents were purchased from commercial sources and used without further purification.

### 1.2. Physical measurements

Elemental analyses (C, H and N) were performed with an Elementar Vario EL III analytical instrument. IR spectra were recorded on a Bruker Vector 22 Fourier Transform Infrared Spectrometer (170SX) (KBr disc). Thermogravimetric (TG) experiment was performed with a TA2000/2960 thermogravimetric analyzer from 30 to 600°C at a warming rate of 10 K/min under a nitrogen atmosphere, and the polycrystalline samples were placed in an aluminum crucible. Powder X-ray diffraction (PXRD) data for the as-prepared was collected using Bruker D8 Advance powder diffractometer operating at 40 kV and 40 mA with Cu K radiation  $\lambda = 1.5418 \text{ \AA}$  at ambient temperature. Temperature and frequency dependent dielectric constant,  $\epsilon'$ , and dielectric loss,  $\tan(\delta)$ , measurements were carried out employing Concept 80 system (Novocontrol, Germany); the powdered pellet, with a thickness of ca. 0.40 mm and 78.5 mm<sup>2</sup> in the area, was coated by gold films on the opposite surfaces and sandwiched by the copper electrodes and the ac frequencies span from 1 Hz to 10<sup>6</sup> Hz.

**X-ray crystallography.** Selected crystals of **1** at room temperature were centered on an Oxford Diffraction Xcalibur diffractometer equipped with a Sapphire 3 CCD detector and a graphite monochromated Mo K $\alpha$  ( $\lambda = 0.71073 \text{ \AA}$ ). The data collection routine, unit cell refinement, and data processing were carried out with the program CrysAlis.<sup>1</sup> Structures were solved by the direct method and refined by the full-matrix least-squares procedure on F<sup>2</sup> using SHELXL-97 program.<sup>2</sup> The non-Hydrogen atoms were anisotropically refined using the full-matrix least-squares method on F<sup>2</sup>. The crystallographic details about data collection, structural refinement and selected bond length and angle are summarized in Table 1 and 2.

### 1.3. Preparations for **1**

The synthesis procedure of compound **1** is in following described: First, the  $\text{CoCl}_2 \cdot 6\text{H}_2\text{O}$  (0.0237 g) and 1,4-diazabicyclo[2.2.2]octane (0.05 g) were dissolved in 6 ml DMF. The mixture were stirred for 3h, then 0.05 g phosphite was added and stirred another 1h. The mixture were sealed in Teflon-lined autoclave and heated to 60 °C for 72h. Blue needle-shape crystals were obtained in solution. The crystal was washed with DMF and acetone and dried in air. The yield is ca. 65% .

#### References:

1. *CrysAlis VI.171*, Oxford Diffraction Ltd., Poland, 2004.
2. G. M. Sheldrick, *SHELXL-97*, Program for the Refinement of Crystal structure, University of Göttingen, Germany, 1997.

Table 1 Crystal and structural refinement data for compound **1**

| Complex                 | <b>1</b>                                                  |
|-------------------------|-----------------------------------------------------------|
| Molecular formula       | $\text{C}_6\text{H}_{16}\text{N}_2\text{CoP}_2\text{O}_6$ |
| Molecular mass          | 333.08                                                    |
| Space group             | $\text{P}2_12_12_1$                                       |
| Crystal system          | orthorhombic                                              |
| Temp/K                  | 296(2)                                                    |
| Wavelength (Å )         | 1.5406                                                    |
| a/Å                     | 10.090(2)                                                 |
| b/Å                     | 10.782(5)                                                 |
| c/Å                     | 10.981(7)                                                 |
| $\alpha/^\circ$         | 90                                                        |
| $\beta/^\circ$          | 90                                                        |
| $\gamma/^\circ$         | 90                                                        |
| $V/\text{Å}^3 \cdot Z$  | 1194.63(4)                                                |
| $\mu/\text{mm}^{-1}$    | 1.722                                                     |
| $\lambda/\text{Å}$      | 0.71073                                                   |
| $\rho/\text{g cm}^{-3}$ | 1.85182                                                   |
| F000                    | 684                                                       |
| $R_1$                   | 0.0521                                                    |
| w $R_2$                 | 0.1240                                                    |



Table 2 Selected Bond Lengths [ $\text{\AA}$ ] and Angles [deg] for compound **1**

| <b>1</b>         |            |                  |            |
|------------------|------------|------------------|------------|
| Co(1)-O(4)       | 1.934(4)   | Co(1)-O(5)       | 1.936(4)   |
| Co(1)-O(3)       | 1.957(4)   | Co(1)-O(2A)      | 1.961(4)   |
| O(1)-P(1)        | 1.524(4)   | O(2)-P(1)        | 1.505(4)   |
| O(2)-Co(1B)      | 1.961(4)   | O(3)-P(1)        | 1.512(4)   |
| O(4)-Co(1)-O(5)  | 109.63(18) | O(4)-Co(1)-O(3)  | 110.44(16) |
| O(5)-Co(1)-O(3)  | 102.13(18) | O(4)-Co(1)-O(2A) | 112.10(17) |
| O(5)-Co(1)-O(2A) | 111.94(18) | O(3)-Co(1)-O(2A) | 110.17(16) |
| P(2C)-O(4)-Co(1) | 130.2(2)   | P(2)-O(5)-Co(1)  | 148.1(3)   |
| O(2)-P(1)-O(3)   | 111.8(2)   | O(2)-P(1)-O(1)   | 113.5(2)   |
| O(3)-P(1)-O(1)   | 110.0(2)   | O(2)-P(1)-H(3)   | 106(3)     |



Figure S1 Powder X-ray diffraction patterns for as-prepared sample of **1**, confirming the phase purity of the as-prepared sample (Black lines: experimental patterns; red lines: simulated profiles).



Figure S2 TG plot of **1** at selected temperature range



Figure S3 IR spectrum of **1** at room temperature



Figure S4 Crystal structure of **1** illustrating the 3D framework along the *c* axis



Figure S5 Frequency dependencies of the  $\epsilon'$  of **1** in the 40-120 °C temperature range



Figure S6 Frequency dependencies of  $\tan (\delta)$  of **1** in the 40-120 °C temperature range



Figure S7 The  $\epsilon'$  value of **1** in the room temperature range



Figure S8 Complex impedance of **1** at 25 °C.
